# Supplementary material for: Olfactory Bulb and Amygdala Gene Expression Changes in Subjects Dying with COVID-19
Source: bioRxiv or medRxiv preprint supplement (doi:10.1101/2021.09.12.21263291), 2021-09-15
Supplement: Supplementary file [file media-1.pdf]

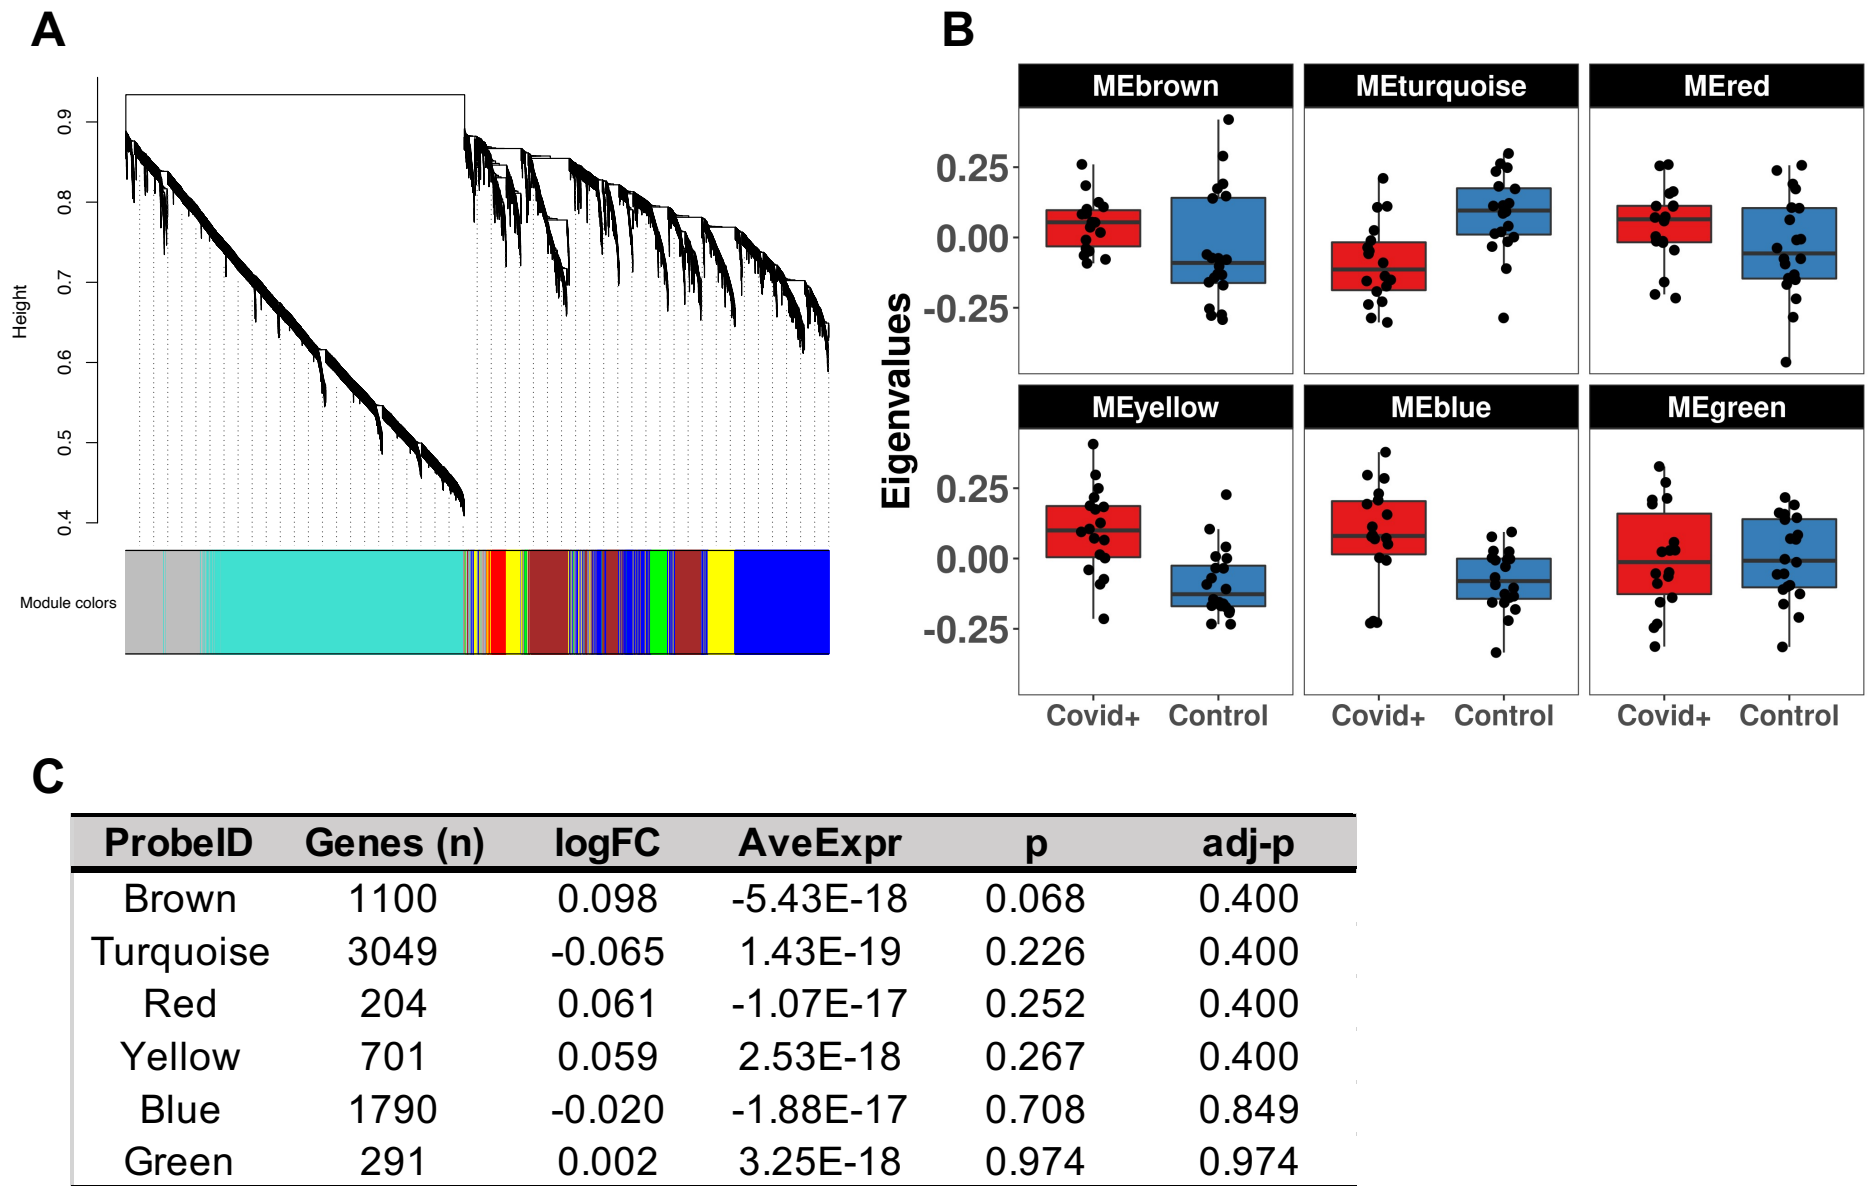

**Figure S1.** WGCNA analysis in amygdala. We detected 6 coexpression modules (A) not differentially expressed between Covid+ and Controls (B and C)
