# Supplementary material for: Olfactory Bulb and Amygdala Gene Expression Changes in Subjects Dying with COVID-19
Source: bioRxiv or medRxiv preprint supplement (doi:10.1101/2021.09.12.21263291), 2021-09-15
Supplement: Supplementary file [file media-2.pdf]

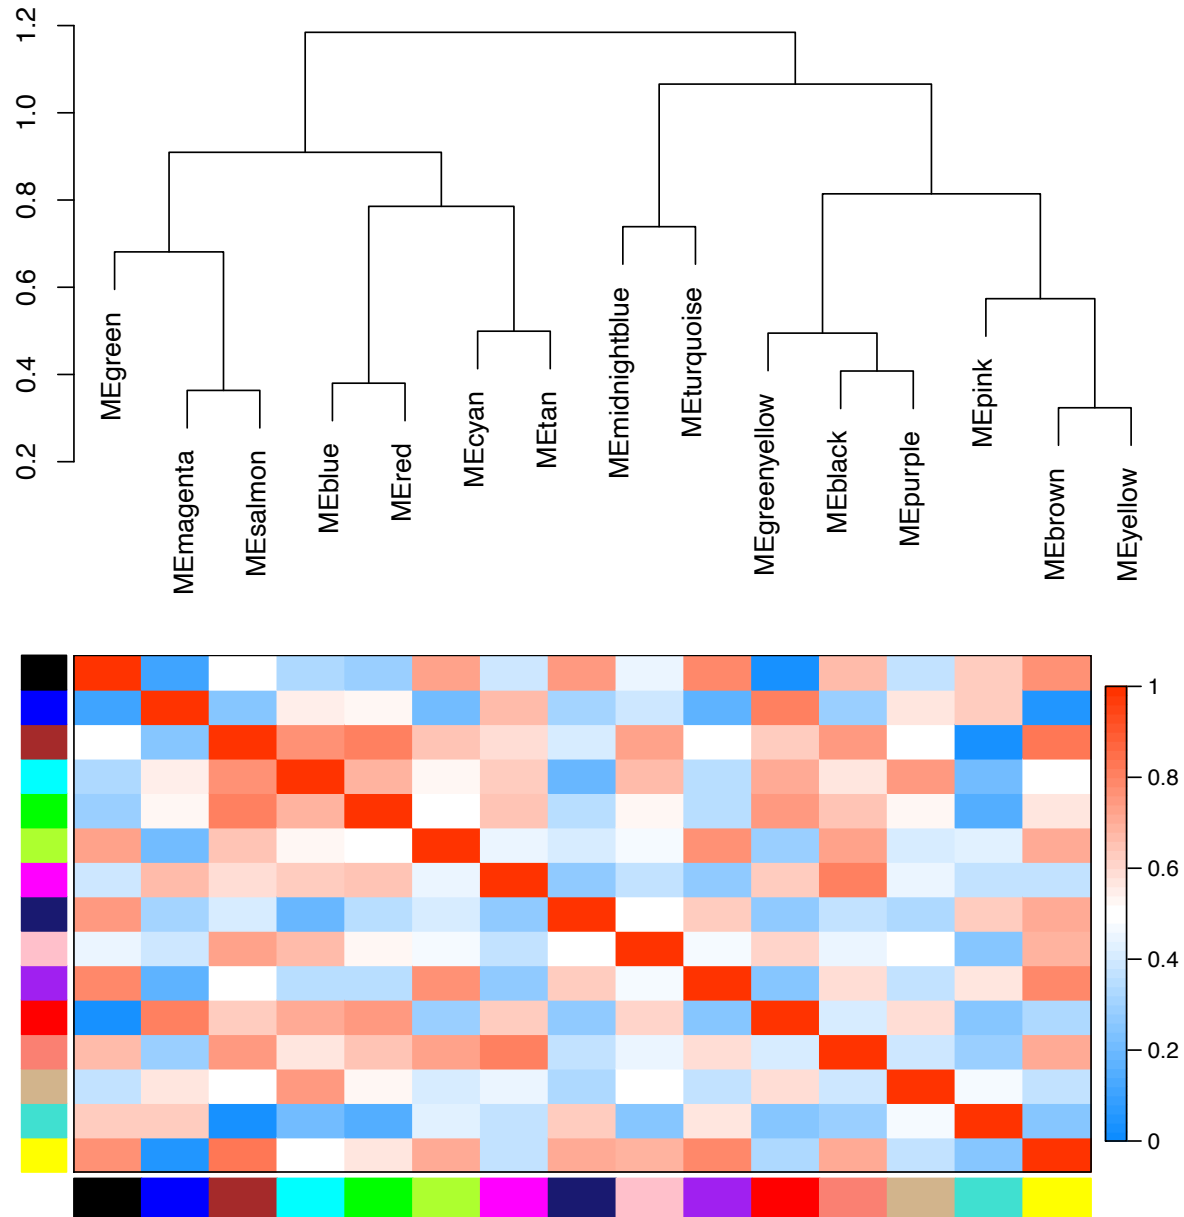

**Figure S2.** Dendrogram representing the relationship between WGCNA modules from OBT
