# Supplementary material for: Olfactory Bulb and Amygdala Gene Expression Changes in Subjects Dying with COVID-19
Source: bioRxiv or medRxiv preprint supplement (doi:10.1101/2021.09.12.21263291), 2021-09-15
Supplement: Supplementary file [file media-3.pdf]

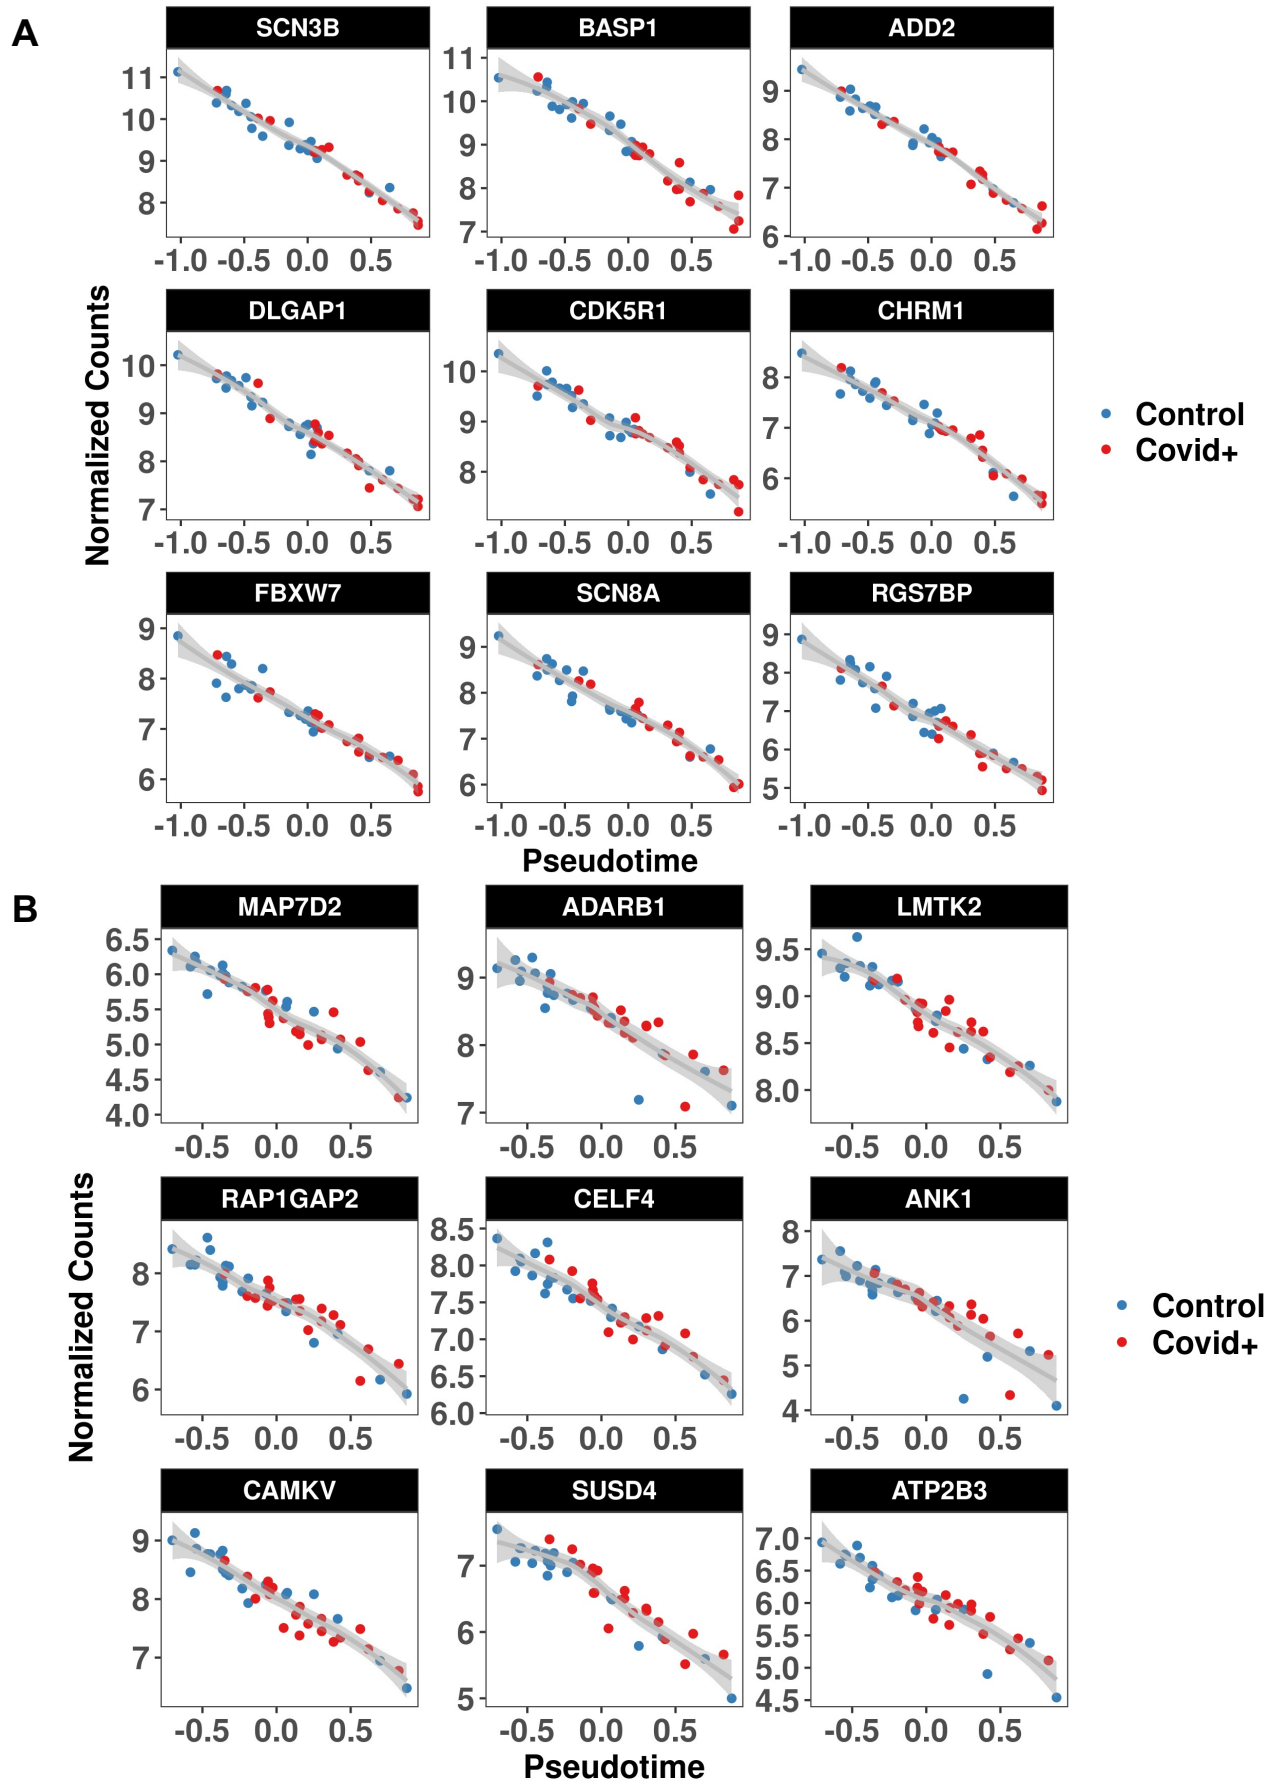

**Figure S3.** Top nine genes significantly correlated with pseudotime in amygdala (A) and olfactory bulb (B) but not differentially expressed between Covid+ and Controls (FDR > 0.05)
